# Supplementary material for: Overexpression of the protein disulfide isomerase AtCYO1 in chloroplasts slows dark-induced senescence in Arabidopsis
Source: PubMed Central journal article supplement (PMC5935949; doi:10.1186/s12870-018-1294-5), 2018-05-04
Supplement: 12870_2018_1294_MOESM5_ESM.pdf [file 12870_2018_1294_MOESM5_ESM.pdf]

9 DDI

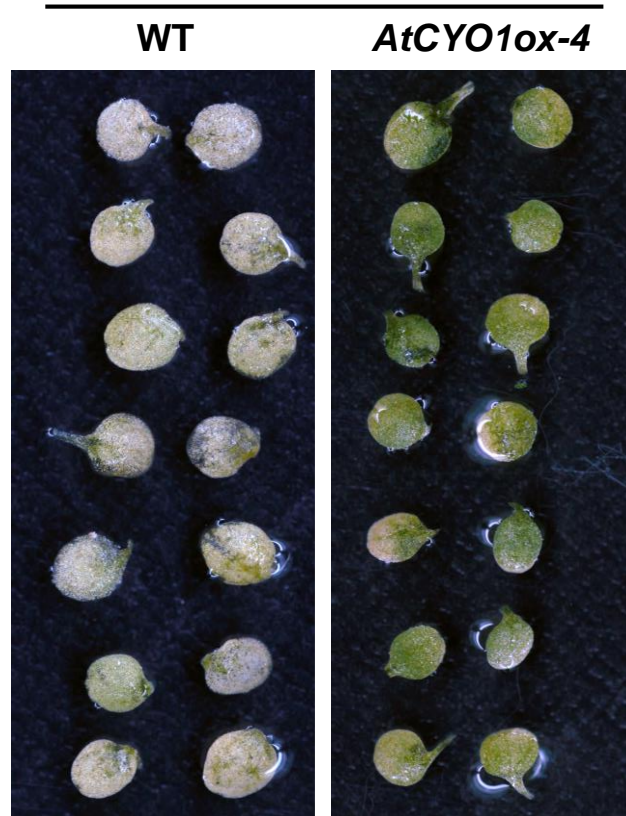

**Figure S2** Cotyledons at 9 DDI.

Whole plants were subjected to the dark incubation.
