# Supplementary material for: Overexpression of the protein disulfide isomerase AtCYO1 in chloroplasts slows dark-induced senescence in Arabidopsis
Source: PubMed Central journal article supplement (PMC5935949; doi:10.1186/s12870-018-1294-5), 2018-05-04
Supplement: 12870_2018_1294_MOESM7_ESM.pdf [file 12870_2018_1294_MOESM7_ESM.pdf]

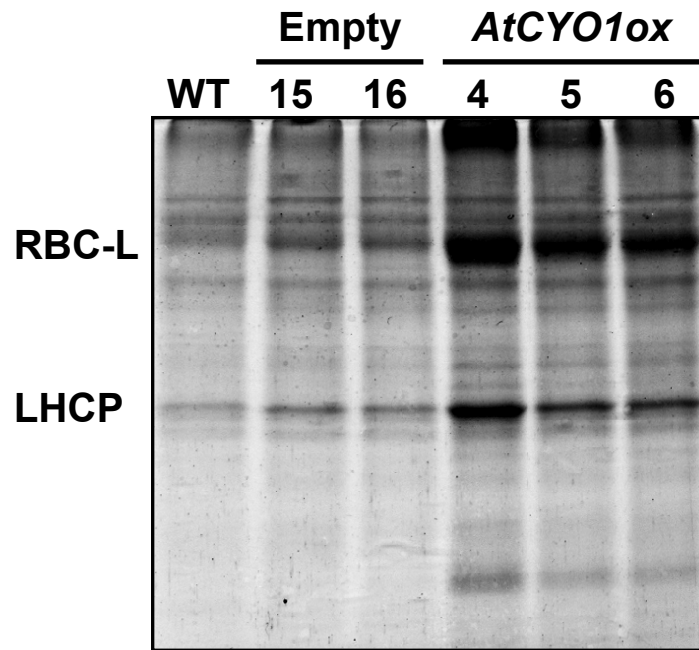

**Figure S4** Maintenance of RBC-L and LHCP at 10 DDI as indicated by Coomassie staining following SDS-PAGE.
