# Supplementary material for: Overexpression of the protein disulfide isomerase AtCYO1 in chloroplasts slows dark-induced senescence in Arabidopsis
Source: PubMed Central journal article supplement (PMC5935949; doi:10.1186/s12870-018-1294-5), 2018-05-04
Supplement: 12870_2018_1294_MOESM11_ESM.pdf [file 12870_2018_1294_MOESM11_ESM.pdf]

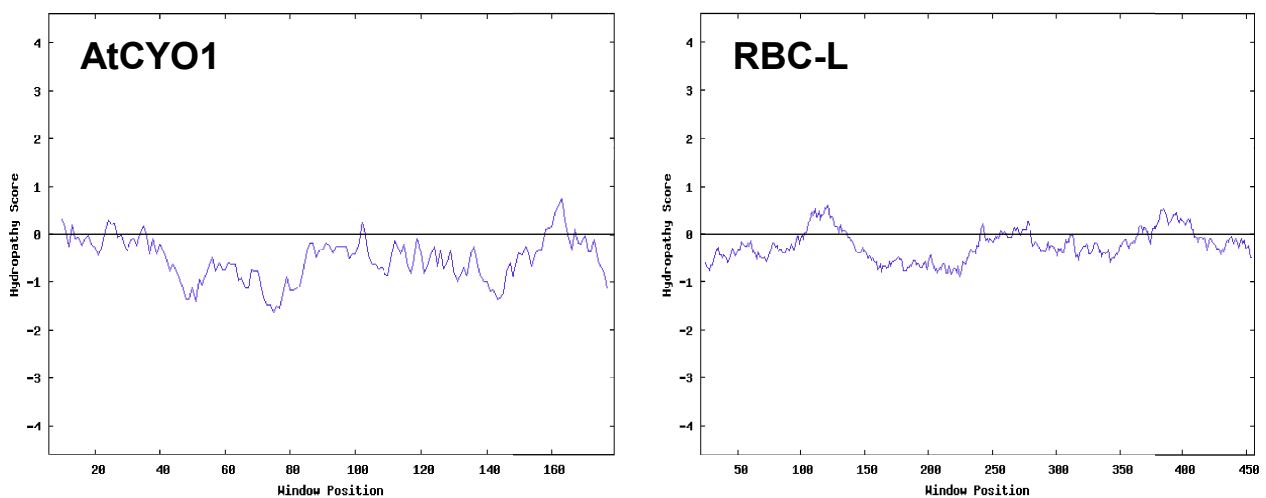

**Figure S5** Hydropathic character of AtCYO1, with RBC-L for comparison.

Amino acid sequences were analyzed using the Kyte-Doolittle hydropathy plot (<http://gcat.davidson.edu/DGPB/kd/kyte-doolittle.htm>). Positive and negative values indicate hydrophobic and hydrophilic residues, respectively.
